# Supplementary material for: Precision-guided treatment in high-risk pediatric cancers
Source: PubMed Central journal article supplement (PMC11271405; doi:10.1038/s41591-024-03044-0), 2024-06-06
Supplement: 41591_2024_3044_MOESM1_ESM.pdf [file 41591_2024_3044_MOESM1_ESM.pdf]

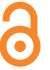

---

# Precision-guided treatment in high-risk pediatric cancers

---

In the format provided by the authors and unedited

## **Table of Contents**

|                        |                                                                                 |
|------------------------|---------------------------------------------------------------------------------|
| Supplementary table 1. | Availability of clinical tests for PGT targets.                                 |
| Supplementary table 2. | Details of salvage therapy.                                                     |
| Supplementary table 3. | Details of 40 PGTs received by 38 patients with CNS tumor and clinical benefit. |

**Supplementary table 1. Availability of clinical tests for PGT targets.**

| Target    | PGT N | Clinical tests |             |                                         |                                                                      |
|-----------|-------|----------------|-------------|-----------------------------------------|----------------------------------------------------------------------|
|           |       | Available N    | Performed N | Results                                 | Target (test)                                                        |
| Fusion/SV | 17    | 3              | 3           | 3 negative                              | 2 ETV6-NTRK3 (ETV6 break-apart FISH)<br>1 CASK-NTRK2 (RNA-seq panel) |
| SNV       | 46    | 7              | 6           | 1 equivocal                             | 1 IDH1 (IHC)                                                         |
|           |       |                |             | 5 positive                              | 1 IDH2 (NGS panel)<br>2 RET (NGS panel)<br>2 BRAF V600E (IHC) *      |
| CNV       | 19    | 1              | 1           | 1 positive                              | 1 ALK amp. (SNP array)                                               |
| RNA       | 27    | 0              | -           | -                                       |                                                                      |
| Other     | 8     | 2              | 0           | -                                       |                                                                      |
| Total     | 117   | 13             | 10          | 6 positive<br>3 negative<br>1 equivocal |                                                                      |

\* One additional CNS tumour had both a BRAF V600E and MEK2 mutation, and only the BRAF V600E was identified by clinical testing. The MEK2 mutation suggested that the tumour may be resistant to BRAF inhibitor monotherapy and the patient received dual BRAF/MEK inhibitor therapy as recommended.

**Supplementary table 2. Details of salvage therapy.**

|                       | PGT |     | Non-PGT |     |
|-----------------------|-----|-----|---------|-----|
|                       | N   | %   | N       | %   |
| Total no. of patients | 89  |     | 84      |     |
| No salvage therapy    | 62  | 70% | 46      | 55% |
| Salvage therapy       | 27  | 30% | 38      | 45% |
| <hr/>                 |     |     |         |     |
| No salvage therapy    |     |     |         |     |
| Alive with no PD      | 23  | 37% | 10      | 22% |
| No salvage after PD   | 38  | 61% | 33      | 72% |
| Death from TRM        | 1   | 2%  | 1       | 2%  |
| Unknown               | 0   | 0%  | 2       | 4%  |
| <hr/>                 |     |     |         |     |
| Salvage therapy       |     |     |         |     |
| By treatment type     |     |     |         |     |
| 1 line                |     |     |         |     |
| PGT                   | 5   | 19% | 4       | 11% |
| UGT                   | 5   | 19% | 7       | 18% |
| SOC                   | 1   | 3%  | 13      | 34% |
| Other experimental    | 6   | 22% | 2       | 5%  |
| 2 lines               | 6   | 22% | 8       | 21% |
| ≥3 lines              | 4   | 15% | 4       | 11% |
| <br>                  |     |     |         |     |
| By cancer type        |     |     |         |     |
| DMG/HGG               | 10  | 37% | 3       | 8%  |
| Other CNS             | 6   | 22% | 7       | 18% |
| Solid tumor           | 11  | 41% | 6       | 16% |
| Hematologic           | 0   | 0%  | 22      | 58% |

DMG, diffuse midline glioma, H3K27M mutant; HGG, high grade glioma; PD, progressive disease; PGT, precision-guided treatment; SOC, standard of care; TRM, treatment related mortality; UGT, molecularly unguided therapy.

Note: Salvage therapy refers to treatment given for relapse or disease progression following one line of treatment post MTB discussion.

**Supplementary table 3. Details of 40 PGTs received by 38 patients with CNS tumor and clinical benefit.**

| Histologic diagnosis            | Methylation class                                                 | Methylation interpretation | PGT                     | PGT target                                    | PGT best response | PGT OCB |
|---------------------------------|-------------------------------------------------------------------|----------------------------|-------------------------|-----------------------------------------------|-------------------|---------|
| High grade glioma WHO G4        | Glioblastoma, IDH wildtype, subclass midline                      | Match                      | Veliparib/TMZ           | BRCA2 biallelic loss                          | SD                | Yes     |
| High grade glioma WHO G4        | Diffuse midline glioma H3 K27M mutant                             | Low score match            | Bevacizumab/sirolimus   | PIK3CA E545A, PTEN loss, high VEGFA           | PR                | Yes     |
| High grade glioma WHO G4        | Not performed                                                     | NA                         | Trametinib/dabrafenib   | BRAF V600E                                    | CR                | Yes     |
| Glioblastoma WHO G4             | Glioblastoma, IDH wildtype, H3.3 G34 mutant                       | Match                      | Ribociclib/everolimus   | PTEN biallelic, loss, CDKN2A/B biallelic loss | SD                | No      |
| Glioblastoma WHO G4             | (anaplastic) pleomorphic xanthoastrocytoma                        | No match                   | Larotrectinib           | NTRK2-KANK1                                   | CR                | Yes     |
| High grade glioma WHO 3/4       | Glioblastoma, IDH wildtype, H3.3 G34 mutant                       | Match                      | Dasatinib               | PDGFRA C235Y                                  | SD                | Yes     |
| High grade glioma WHO 3/4       | No methylation class with score >= 0.30                           | No match                   | Trametinib/dabrafenib   | BRAF V600E                                    | SD                | Yes     |
| High grade glioma WHO G3        | Glioblastoma, IDH wildtype, subclass RTK III                      | Low score match            | Ribociclib/everolimus   | CDKN2A/B biallelic loss                       | SD                | No      |
| High grade glioma WHO G3        | Glioblastoma, IDH wildtype, subclass RTK III                      | Match                      | Trametinib              | NF1 Y489C, NF1 Q1742*                         | SD                | Yes     |
| High grade glioma               | Glioblastoma, IDH wildtype, H3.3 G34 mutant                       | Match                      | TMZ                     | pMGMT methylation                             | SD                | No      |
| High grade glioma               | LGG, subclass hemispheric pilocytic astrocytoma and ganglioglioma | No match                   | Ponatinib               | FGFR1-FGFR1                                   | PR                | Yes     |
| Anaplastic astrocytoma WHO G3   | (anaplastic) pleomorphic xanthoastrocytoma                        | Discordant                 | Larotrectinib           | KANK1-NTRK2                                   | PR                | Yes     |
| Anaplastic astrocytoma WHO G3 † | Glioblastoma, IDH wildtype, subclass MYCN                         | Low score match            | Trametinib/ribociclib   | NF1 R192* (LOH), CDKN2A/B biallelic loss      | SD                | No      |
| Anaplastic astrocytoma WHO G3 † | Glioblastoma, IDH wildtype, subclass MYCN                         | Low score match            | Abemaciclib             | CDKN2A/B biallelic loss                       | SD                | No      |
| Anaplastic astrocytoma WHO G3   | No methylation class with score >= 0.30                           | No match                   | Nivolumab               | High TMB, PMS2 E705K                          | SD                | NE      |
| PXA WHO G3                      | No methylation class with score >= 0.30                           | No match                   | Trametinib/dabrafenib   | BRAF V600E, MEK2 F57C                         | SD                | Yes     |
| Glioneuronal tumour WHO G4      | No methylation class with score >= 0.30                           | No match                   | Larotrectinib           | NTRK2-CASK                                    | SD                | Yes     |
| Anaplastic glioneuronal tumor   | Diffuse leptomeningeal glioneuronal tumor                         | Discordant                 | Larotrectinib           | SOX6-NTRK2                                    | PR                | Yes     |
| DMG, H3 K27M mutant             | Diffuse midline glioma H3 K27M mutant                             | Match                      | Everolimus/ONC-201      | PIK3R1 N564D                                  | SD                | NE      |
| DMG, H3 K27M mutant ††          | Diffuse midline glioma H3 K27M mutant                             | Match                      | Olaparib/durvalumab     | BRCA2 S1979*                                  | CR                | Yes     |
| DMG, H3 K27M mutant ††          | Diffuse midline glioma H3 K27M mutant                             | Match                      | Bevacizumab/carboplatin | High VEGFA RNA                                | SD                | No      |
| DMG, H3 K27M mutant             | Diffuse midline glioma H3 K27M mutant                             | Low score match            | Afatinib                | EGFR amp                                      | SD                | No      |
| DLGNT                           | Diffuse leptomeningeal glioneuronal tumor, subtype 2              | Match                      | Trametinib              | BRAF-KIAA1549                                 | SD                | No      |
| Glioneuronal tumour             | LGG, subclass hemispheric pilocytic astrocytoma and ganglioglioma | Low score match            | Afatinib                | CLIP2-EGFR                                    | PR                | Yes     |
| Ganglioglioma                   | No methylation class with score >= 0.30,                          | No match                   | Trametinib/dabrafenib   | BRAF V600E                                    | SD                | Yes     |
| Ganglioglioma                   | control tissue, reactive tumor microenvironment                   | Discordant (low purity)    | Trametinib/dabrafenib   | BRAF V600D                                    | PR                | Yes     |
| Diffuse glioma WHO G2/3         | Glioblastoma, IDH wildtype, subclass midline                      | Discordant                 | Trametinib              | BRAF-KIAA1549                                 | SD                | Yes     |
| Astrocytoma WHO G2              | Not performed                                                     | NA                         | Temozolomide            | IDH1 R132H                                    | PR                | Yes     |
| Pilocytic astrocytoma           | Low grade glioma, subclass posterior fossa pilocytic astrocytoma  | Match                      | Trametinib              | BRAF-PID1                                     | SD                | Yes     |
| Pilocytic astrocytoma           | Low grade glioma, subclass midline pilocytic astrocytoma          | Match                      | Trametinib              | PTPN11 E69K, FGFR1 N546K                      | SD                | Yes     |
| Pilocytic astrocytoma           | Low grade glioma, subclass midline pilocytic astrocytoma          | Match                      | Trametinib              | PTPN11 D61N, FGFR1 N546K                      | SD                | Yes     |
| MB, non WNT/non-SHH             | No methylation class with score >= 0.30                           | No match                   | IRN/TMZ                 | pMGMT methylation                             | NE                | Yes     |
| MB, SHH-activated               | Medulloblastoma, subclass SHH A (children and adult)              | Match                      | Nivolumab               | PMS2 R563*, high TMB                          | SD                | Yes     |
| Posterior fossa A ependymoma    | Ependymoma, posterior fossa group A                               | Match                      | Everolimus/etoposide    | High mTOR RNA                                 | NE                | Yes     |
| Posterior fossa A ependymoma    | Ependymoma, posterior fossa group A                               | Match                      | Bevacizumab             | High VEGFA RNA                                | PR                | Yes     |
| Supratentorial ependymoma       | Ependymoma, RELA fusion                                           | Match                      | Ponatinib               | High ABL1, VEGFB RNA                          | SD                | No      |
| ETMR                            | Embryonal tumor with multilayered rosettes                        | Match                      | Azacitidine/carboplatin | High DNMT3B RNA                               | NE                | No      |
| Pineoblastoma                   | Pineoblastoma group B                                             | Match                      | Temsirolimus/IRN/TMZ    | High mTOR RNA                                 | NE                | No      |
| CNS embryonal tumour            | No methylation class with score >= 0.30                           | No match                   | Nivolumab/ipilimumab    | High TMB, MSH2 R383*                          | SD                | Yes     |
| Clear cell meningioma           | No methylation class with score >= 0.30                           | No match                   | Dasatinib               | High ABL1 RNA                                 | SD                | Yes     |

Abbreviation: CR, complete response; DLGNT, diffuse leptomeningeal glioneuronal tumor; DMG, diffuse midline glioma; ETMR, embryonal tumor with multilayered rosettes IRN, irinotecan; LGG, low grade glioma; LOH, loss of heterozygosity; MB, medulloblastoma; NE, not evaluable; PR, partial response; PXA, pleomorphic xanthoastrocytoma; SD, stable disease; TMZ, temozolomide; Note: † and ††: same patient receiving different PGT
